# Supplementary material
Source: Research Square preprint supplement (doi:10.21203/rs.3.rs-8693419/v1)
Supplement: Supplementary file 1 [file 22abbbbc2c64f4ff673436b5.docx]

|  | TB n=42 | NTM n=44 | p-value |
| --- | --- | --- | --- |
| **Male**，n(%) | 25(59.52) | 16(36.36) | 0.053 |
| **Female**，n(%) | 17(40.48) | 28(63.64) |
| **Mean Age** | 55.02±17.30 | 52.52±15.44 | 0.481 |
| **History of Prior Infection**，n(%) | 3(7.14) | 3(6.82) | 1.000 |
| **Diabetes Mellitus**，n(%) | 9(21.43) | 3(6.82) | 0.065 |
| **Clinical Symptoms** |  |  |  |
| Cough，n(%) | 24(57.14) | 31(70.45) | 0.289 |
| Fever，n(%) | 12(28.57) | 8(18.18) | 0.312 |
| Fatigue，n(%) | 1(2.38) | 4(9.09) | 0.361 |
| Chest Pain / Chest Tightness，n(%) | 1(2.38) | 3(6.82) | 0.616 |
| Weight Loss，n(%) | 0(0) | 2(4.55) | 0.494 |
| **Chest Imaging Findings** |  |  |  |
| Pulmonary Shadowing，n(%) | 35(83.33) | 30(68.18) | 0.166 |
| Pulmonary Cavitation，n(%) | 10(23.81) | 12(27.27) | 0.904 |
| Pulmonary Nodule(s)，n(%) | 19(45.24) | 25(56.82) | 0.391 |
| Pulmonary Bulla(e)，n(%) | 2(4,76) | 1(2.27) | 0.612 |
| Bronchiectasis，n(%) | 6(14.29) | 10(22.73) | 0.409 |
| Bronchial Stenosis，n(%) | 1(2.38) | 1(2.27) | 1.000 |
| Pleural Effusion，n(%) | 4(9.52) | 1(2.27) | 0.197 |
| **Immunodeficiency or Immunosuppressive Conditions** |  |  |  |
| Immunocompromised State，n(%) | 0(0) | 1(2.27) | 1.000 |
| Immunodeficiency Disease，n(%) | 0(0) | 2(4.55) | 0.494 |
| Immunosuppression，n(%) | 9(21.43) | 6(13.64) | 0.402 |
| **Other Factors** |  |  |  |
| Exposure to Dust/Soil，n(%) | 1(2.38) | 2(4.55) | 1.000 |
| History of Bird Contact，n(%) | 1(2.38) | 0(0) | 0.488 |
| Smoking，n(%) | 5(11.9) | 6(13.64) | 1.000 |
