# Supplementary material
Source: Research Square preprint supplement (doi:10.21203/rs.3.rs-8693419/v1)
Supplement: Supplementary file 1 [file b8e0957c366be1806b845303.docx]

| mNGS  (-) | 0 | 7 |
| --- | --- | --- |
| mNGS  (+) | 30 | 5 |
|  | MC-PCR  (TB+) | MC-PCR  (TB-) |

| mNGS  (-) | 1 | 10 |
| --- | --- | --- |
| mNGS  (+) | 31 | 2 |
|  | MC-PCR  (NTM+) | MC-PCR  (NTM-) |
