# Supplementary material
Source: Research Square preprint supplement (doi:10.21203/rs.3.rs-8693419/v1)
Supplement: Supplementary file 3 [file b90b26ac11fd3df37c97c11c.docx]

| **Table 2. Diagnostic Performance of Various Tests Compared to the Final Clinical Diagnosis.** | | | | | |
| --- | --- | --- | --- | --- | --- |
| Specimen Group | Test Method | Sensitivity（95%CI；n/N) | Specificity（95%CI；n/N) | PPV（95%CI；n/N) | NPV（95%CI；n/N) |
| TB组 |  |  |  |  |  |
|  | mNGS | 96.67%(0.828-0.999;29/30) | 50.00%(0.187-0.813;5/10) | 85.29%%(0.684-0.950;29/34) | 83.33%(0.359-0.996;5/6) |
|  | MC-PCR | 83.33%(0.653-0.944;25/30) | 60.00%(0.262-0.878;6/10) | 83.33%%(0.653-0.944;25/30) | 54.55%(0.234-0.833;6/11) |
|  | Culture | 53.33%(0.343-0.717;16/30) | 100.00%(0.692-1.000;10/10) | 100.00%(0.794-1.000;16/16) | 41.67%(0.221-0.634;10/24) |
|  | AFS | 6.67%(0.008-0.221;2/30) | 100.00%(0.692-1.000;10/10) | 100.00%(0.158-1.000;2/2) | 26.32%(0.134-0.431;10/38) |
|  | PCR | 56.00%(0.349-0.756;14/25) | 100.00%(0.692-1.000;10/10) | 100.00%(0.768-1.000;14/14) | 47.62%(0.257-0.702;10/21) |
|  | Xpert | 52.38%(0.298-0.743;11/21) | 100.00%(0.478-1.000;5/5) | 100.00%(0.715-1.000;11/11) | 33.33%(0.118-0.616;5/15) |
|  | T-Spot.TB | 87.50%(0.617-0.984;14/16) | 50.00%(0.068-0.932;2/4) | 87.50%(0.617-0.984;14/16) | 50.00%(0,068-0.932;2/4) |
| NTM组 |  |  |  |  |  |
|  | mNGS | 96.77%(0.833-0.999;30/31) | 76.92%(0.462-0.950;10/13) | 90.91%(0.757-0.981;30/33) | 90.91%(0.587-0.998;10/11) |
|  | MC-PCR | 93.55%(0.786-0.992;29/31) | 76.92%(0.462-0.950;10/13) | 90.63%(0.750-0.980;29/32) | 83.33%(0.516-0.979;10/12) |
|  | Culture | 67.74%(0.486-0.883;21/31) | 92.31%(0.640-0.998;12/13) | 95.45%(0.772-0.999;21/22) | 54.55%(0.322-0.756;12/22) |
|  | AFS | 6.45%(0.008-0.214;2/31) | 100.00%(0.753-1.000;13/13) | 100.00%(0.158-1.000;2/2) | 30.95%(0.176-0.471;13/42) |
|  | PCR | 36.67%(0.199-0.561;11/30) | 100.00%(0.715-1.000;11/11) | 100.00%(0.715-1.000;11/11) | 36.67%(0.199-0.561;11/30) |
